# Supplementary material
Source: HighWire-hosted journal article supplement (https://cmaj.ca/highwire/filestream/74773/field_highwire_adjunct_files/0/190961-image-1-at.pdf)
Supplement: 190961-image-1-at.pdf [file 190961-image-1-at.pdf]

**Appendix 1 (as submitted by the authors): Supplementary figure**

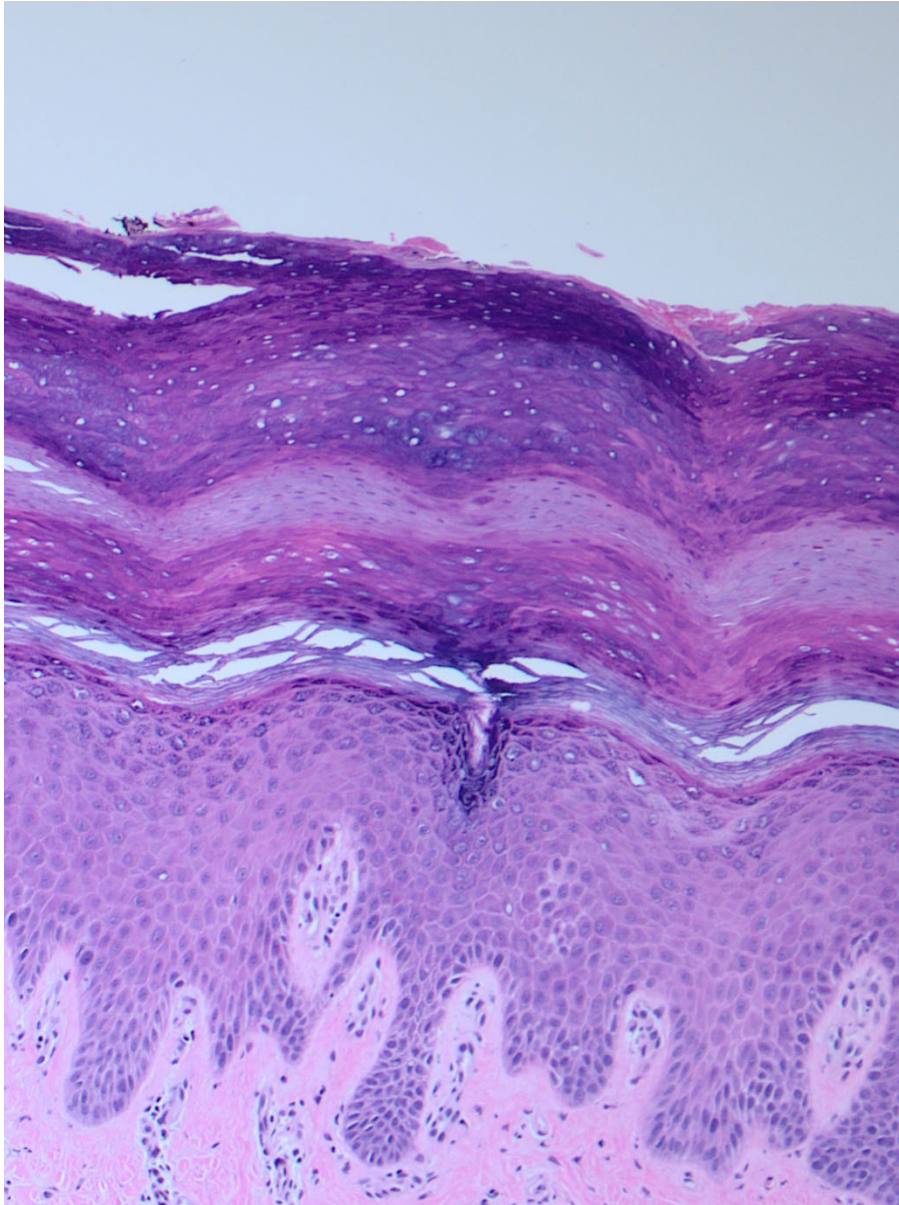

Biopsy specimen showing alternating, vertical ortho- and para-keratosis compatible with the clinical impression of pityriasis rubra pilaris.
